# Supplementary material for: Soluble TREM2 levels associate with conversion from mild cognitive impairment to Alzheimer’s disease
Source: JCI journal article supplement (doi:10.1172/jci158708), 2022-12-14

## Supplementary Figure 1

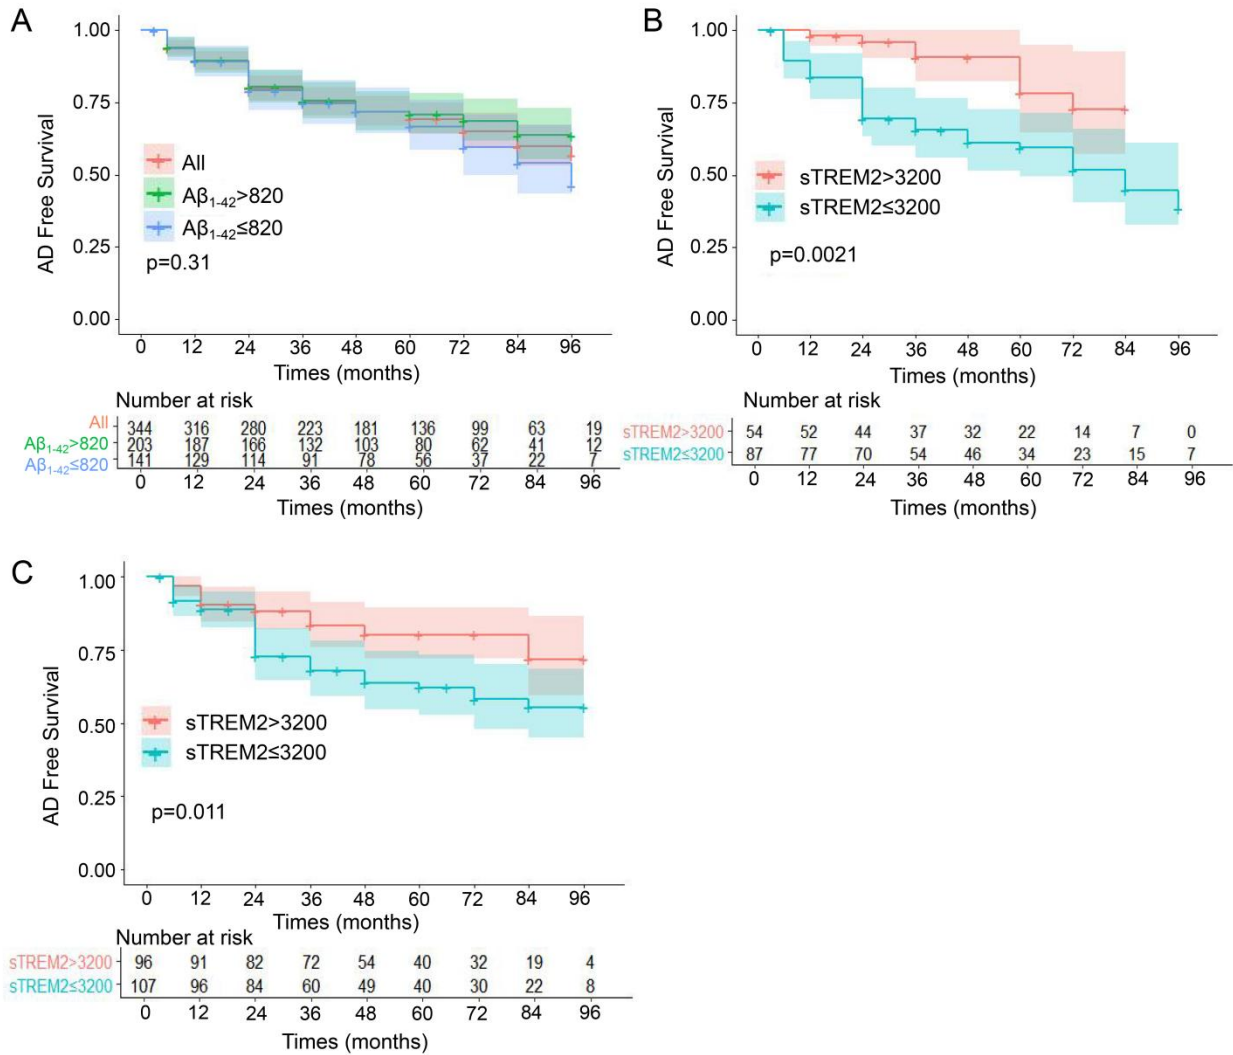

**Supplementary Figure 1.** Kaplan-Meier plot of AD-free survival in MCI patients with different CSF

$A\beta_{1-42}$  levels from ADNI database.

A. No significant difference in mean progression-free survival time in MCI subjects between different

CSF  $A\beta_{1-42}$  levels lower than 820 and higher than 820.

B. CSF sTREM2 levels predicted AD-free survival of MCI patients with CSF  $A\beta_{1-42} < 820$ .

C. CSF sTREM2 levels predicted AD-free survival of MCI patients with CSF  $A\beta_{1-42} \geq 820$ .

A total of 146, 344 and 111 HCs and MCI and AD patients, respectively, were included for analysis. Data were analyzed by using the Kaplan-Meier method.

## Supplementary Figure 2

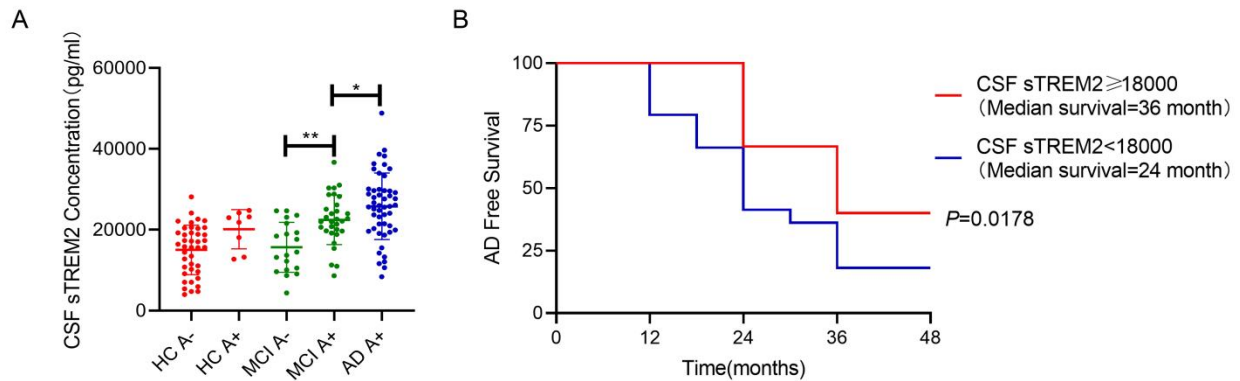

**Supplementary Figure 2.** CSF sTREM2 levels predicted AD-free survival of MCI patients from CABLE cohort.

A. CSF sTREM2 levels were significant increasing in MCI groups with amyloid deposition (A+) and further significant increasing in AD groups with amyloid deposition (A+).

B. CSF sTREM2 levels predicted AD-free survival of MCI (A+) patients, and CSF sTREM2 levels lower 18000 pg/ml were more liable to develop AD.

Data represent mean  $\pm$  SEM. \*:  $p < 0.05$ ; \*\*:  $p < 0.01$ . A total of 50, 50 and 50 HCs and MCI and AD patients, respectively, were included for analysis. One-way ANOVA with the least significant difference post-hoc test, and Kaplan-Meier method were used.

**Supplementary Figure 3**

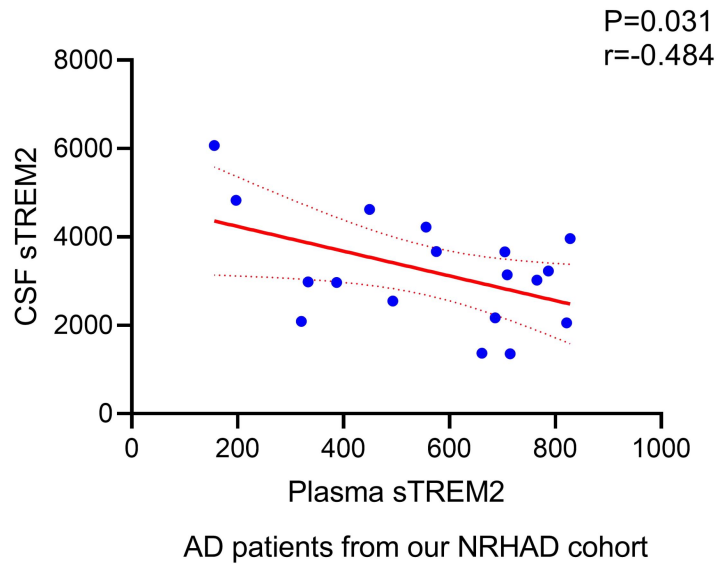

**Supplementary Figure 3.** CSF sTREM2 levels were negative correlation with plasma sTREM2 levels in AD patients in our NRHAD cohort. A total of 18 AD patients were included for analysis. Pearson's correlation test were used.

**Supplementary Table S1.** Evaluations of MCI non-convertors and convertors from ADNI

database in the follow-up

|                                | <b>MCI-nc</b><br><b>(n=241)</b> | <b>MCI-c</b><br><b>(n=103)</b> | <b><i>p</i> value</b>    | <b>HR</b><br><b>(95% CI)</b> |
|--------------------------------|---------------------------------|--------------------------------|--------------------------|------------------------------|
| Follow-up time<br>(month)      | 54.1(25.8)                      | 53.9(23.3)                     | 0.971                    | /                            |
| Age (y)                        | 70.9(7.6)                       | 71.7(6.8)                      | 0.363                    | /                            |
| Gender                         |                                 |                                |                          |                              |
| Female                         | 95(39%)                         | 54(52%)                        | <b>0.027</b>             | /                            |
| Male                           | 148(61%)                        | 50(48%)                        |                          | /                            |
| Education (y)                  | 16.8(3.1)                       | 16.3(2.6)                      | 0.592                    | /                            |
| Predictive biomarker           |                                 |                                |                          |                              |
| CSF sTREM2 (pg/ml)             |                                 |                                |                          |                              |
| <3200                          | 122(51%)                        | 71(69%)                        | <b>0.011<sup>a</sup></b> | 1.72                         |
| ≥3200                          | 119(49%)                        | 32(31%)                        |                          | (1.13-2.61) <sup>a</sup>     |
| CSF Aβ <sub>1-42</sub> (pg/ml) |                                 |                                |                          |                              |
| <820.0                         | 69(29%)                         | 72(70%)                        | <b>0.000<sup>a</sup></b> | 4.35                         |

|                           |          |         |                    |                          |
|---------------------------|----------|---------|--------------------|--------------------------|
| $\geq 820.0$              | 172(71%) | 31(30%) |                    | (2.86-6.67) <sup>a</sup> |
| AV45                      |          |         |                    |                          |
| <1.11                     | 104(43%) | 49(48%) |                    | 0.94                     |
|                           |          |         | 0.775 <sup>a</sup> |                          |
| $\geq 1.11$               | 137(57%) | 54(52%) |                    | (0.59-1.49) <sup>a</sup> |
| ApoE $\epsilon 4$ carrier |          |         |                    |                          |
| (+)                       | 123(51%) | 48(47%) |                    | 1.05                     |
|                           |          |         | 0.834 <sup>a</sup> |                          |
| (-)                       | 118(49%) | 55(53%) |                    | (0.66-1.67) <sup>a</sup> |

a: Student's t test, chi-squared, and Cox proportional hazards model were used, and all results were adjusted for P-Tau/T-Tau, age and gender. The expressed outside the parenthesis of the different values was the mean value, and the inside means the SD value. Actual *p* value: 1: 0.00079.

**Supplementary Table 2.** Evaluations of MCI non-convertors and convertors in the follow-up from our own NRHAD database

|                                   | <b>MCI-nc<br/>(n=67)</b> | <b>MCI-c<br/>(n=23)</b> | <b><i>p</i> value</b>    | <b>HR<br/>(95% CI)</b>    |
|-----------------------------------|--------------------------|-------------------------|--------------------------|---------------------------|
| Age (y)                           | 70.0(4.3)                | 68.6(4.2)               | 0.157                    | /                         |
| Gender                            |                          |                         |                          |                           |
| Female                            | 37(55%)                  | 12(52%)                 | 0.064                    | /                         |
| Male                              | 30(45%)                  | 11(48%)                 |                          | /                         |
| Education (y)                     | 10.3(3.2)                | 11.4(3.3)               | 0.161                    | /                         |
| Predictive biomarker              |                          |                         |                          |                           |
| Plasma sTREM2 (pg/ml)             |                          |                         |                          |                           |
| <460                              | 42(63%)                  | 7(30%)                  | <b>0.008<sup>a</sup></b> | 3.45                      |
| ≥460                              | 25(34%)                  | 16(70%)                 |                          | (1.39-8.55) <sup>a</sup>  |
| Plasma Aβ <sub>1-42</sub> (pg/ml) |                          |                         |                          |                           |
| <25                               | 47(70%)                  | 19(83%)                 | <b>0.039<sup>a</sup></b> | 8.34                      |
| ≥25                               | 20(30%)                  | 4(17%)                  |                          | (1.11-62.52) <sup>a</sup> |
| ApoE ε4 carrier                   |                          |                         |                          |                           |
| (+)                               | 21(31%)                  | 12(52%)                 | 0.405 <sup>a</sup>       | 1.44                      |
| (-)                               | 46(69%)                  | 11(48%)                 |                          | (0.61-3.36) <sup>a</sup>  |

a: Student's t test, chi-squared, and Cox proportional hazards model were used, and all results were adjusted for P-Tau/T-Tau, age and gender. The expressed outside the parenthesis of the different values was the mean value, and the inside means the SD value.

**Supplementary Table 3.** Demographic and clinical features of the participants from CABLE cohort in baseline

| <b>Demographics</b> | <b>HC<br/>(n=50)</b> | <b>MCI<br/>(n=50)</b> | <b>AD<br/>(n=50)</b> | <b><i>p</i> value</b>         |
|---------------------|----------------------|-----------------------|----------------------|-------------------------------|
| Age (y)             | 61.3(8.6)            | 62.5(7.5)             | 64.4(8.3)            | 0.513                         |
| Gender              |                      |                       |                      |                               |
| Female              | 24(48%)              | 25(50%)               | 27(54%)              | 0.829                         |
| Male                | 26(52%)              | 25(50%)               | 23(46%)              |                               |
| Education (y)       | 12.5(3.4)            | 12.3(2.8)             | 9.9(3.6)             | <b>0.025</b> <sup>b,c</sup>   |
| MMSE                | 29.1(1.3)            | 27.3(2.7)             | 21.5(3.9)            | <b>0.002</b> <sup>a,b,c</sup> |
| MoCA                | 27.9(2.3)            | 24.2(3.5)             | 16.5(4.9)            | <b>0.001</b> <sup>a,b,c</sup> |
| ApoE ε4 carrier     |                      |                       |                      |                               |
| (+)                 | 8(16%)               | 12(24%)               | 24(48%)              | <b>0.001</b> <sup>b,c</sup>   |
| (-)                 | 42(84%)              | 38(76%)               | 26(52%)              |                               |

**Abbreviations:** MMSE: Mini Mental State Examination; MoCA: Montreal Cognitive

Assessment; HC: healthy control; MCI: mild cognitive impairment; AD: Alzheimer’s disease.

The expressed outside the parenthesis of the different values was the mean value, and the inside means the SD value.  $p < 0.05$ : “a”: HC vs MCI; “b”: HC vs AD ; “c” : MCI vs AD. One-way ANOVA with the least significant difference post-hoc test, chi-squared and split chi-squared tests, and Cox proportional hazards model were used.



**Supplementary Table 4.** Evaluations of MCI non-convertors and convertors in the follow-up from CABLE cohort

|                                | <b>MCI-nc<br/>(n=24)</b> | <b>MCI-c<br/>(n=26)</b> | <b><i>p</i> value</b>    | <b>HR<br/>(95% CI)</b>   |
|--------------------------------|--------------------------|-------------------------|--------------------------|--------------------------|
| Age (y)                        | 60.5(5.6)                | 63.1(6.8)               | 0.227                    | /                        |
| Gender                         |                          |                         |                          |                          |
| Female                         | 10(42%)                  | 15(58%)                 | 0.257                    | /                        |
| Male                           | 14(58%)                  | 11(42%)                 |                          | /                        |
| Education (y)                  | 14.2(3.1)                | 12.5(2.8)               | 0.402                    | /                        |
| Predictive biomarker           |                          |                         |                          |                          |
| CSFsTREM2<br>(pg/ml)           |                          |                         |                          |                          |
| ≥18000                         | 11(46%)                  | 5(20%)                  | <b>0.034<sup>a</sup></b> | 3.65                     |
| < 18000                        | 13(54%)                  | 21(80%)                 |                          | (1.65-7.64) <sup>a</sup> |
| CSF Aβ <sub>1-42</sub> (pg/ml) |                          |                         |                          |                          |
| <215                           | 11(46%)                  | 20(77%)                 | <b>0.027<sup>a</sup></b> | 3.84                     |
| ≥215                           | 13(54%)                  | 6(23%)                  |                          | (1.73-9.28) <sup>a</sup> |
| ApoE ε4 carrier                |                          |                         |                          |                          |
| (+)                            | 5(21%)                   | 7(27%)                  | 0.615 <sup>a</sup>       | 1.35                     |
| (-)                            | 19(79%)                  | 19(73%)                 |                          | (0.41-5.68) <sup>a</sup> |

a: Student's t test, chi-squared, and Cox proportional hazards model were used, and all results were adjusted for P-Tau/T-Tau, age and gender. The expressed outside the parenthesis of the different values was the mean value, and the inside means the SD value.

## ACKNOWLEDGEMENT LIST FOR ADNI PUBLICATIONS

The Data and Publications Committee, in keeping with the publication policies adopted by the ADNI Steering Committee, here provide lists for standardized acknowledgement. The list consists of three parts: I. ADNI Infrastructure Investigators and Site Investigators, II. DOD ADNI Infrastructure Investigators and Site Investigators and III. ADNI Depression Infrastructure Investigators and Site Investigators. Infrastructure Investigators represent the names responsible for leadership and infrastructure. Site Investigators represent the names of individuals at each recruiting site. All papers, including methodological papers, should have an acknowledgement list that consists of Infrastructure Investigators plus the FULL list.

### I. ADNI I, GO, II and III

#### Part A: Leadership and Infrastructure

##### **Principal Investigator**

Michael W. Weiner, MD                                      University of California, San Francisco

##### **ATRI PI and Director of Coordinating Center Clinical Core**

Paul Aisen, MD                                              University of Southern California

Co PI of Clinical Core Ronald Petersen, MD, PhD                                      Mayo Clinic, Rochester

##### **Executive Committee**

Michael W. Weiner, MD                                      University of California, San Francisco

Paul Aisen, MD                                              University of Southern California

Ronald Petersen, MD, PhD                                      Mayo Clinic, Rochester

Clifford R. Jack, Jr., MD                                      Mayo Clinic, Rochester

William Jagust, MD                                        University of California, Berkeley

John Q. Trojanowki, MD, PhD                                      University of Pennsylvania

Arthur W. Toga, PhD                                        University of Southern California

Laurel Beckett, PhD                                        University of California, Davis

Robert C. Green, MD, MPH                                      Brigham and Women's Hospital/Harvard Medical School

Andrew J. Saykin, PsyD                                      Indiana University

John C. Morris, MD                                        Washington University St. Louis

Richard J. Perrin, MD, PhD                                      Washington University St. Louis

Leslie M. Shaw, PhD                                        University of Pennsylvania

##### **ADNI External Advisory Board (ESAB)**

Zaven Khachaturian, PhD                                      Prevent Alzheimer's Disease 2020 (Chair)

Maria Carrillo, PhD                                        Alzheimer's Association

William Potter, MD                                        National Institute of Mental Health

Lisa Barnes, PhD                                        Rush University

Marie Bernard, MD                                        NIA

Hector González                                        University of California, San Diego

Carole Ho                                              Denali Therapeutics

John K. Hsiao, MD                                        NIH

Jonathan Jackson, PhD                                      Massachusetts General Hospital

Eliezer Masliah, MD                                        NIA

Donna Masterman, MD                                      Biogen

Ozioma Okonkwo, PhD                                      University of Wisconsin, Madison

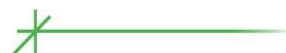

Laurie Ryan, PhD      NIA  
 Nina Silverberg, PhD      NIA

**ADNI 3 Private Partner Scientific Board (PPSB)**

Adam Fleisher, MD      Eli Lilly (Chair)

**Administrative Core - Northern California Institute for Research & Education (NCIRE / The Veterans Health Research Institute)**

|                       |                                                |
|-----------------------|------------------------------------------------|
| Michael W. Weiner, MD | University of California, San Francisco        |
| Diana Truran Sacrey,  | NCIRE / The Veterans Health Research Institute |
| Juliet Fockler,       | University of California, San Francisco        |
| Cat Conti, BA         | NCIRE / The Veterans Health Research Institute |
| Dallas Veitch, PhD    | NCIRE / The Veterans Health Research Institute |
| John Neuhaus, PhD     | University of California, San Francisco        |
| Chengshi Jin, PhD     | University of California, San Francisco        |
| Rachel Nosheny, PhD   | University of California, San Francisco        |
| Miriam Ashford, PhD   | NCIRE / The Veterans Health Research Institute |
| Derek Flenniken,      | NCIRE / The Veterans Health Research Institute |
| Adrienne Kormos,      | NCIRE / The Veterans Health Research Institute |

**Data and Publications Committee**

Robert C. Green, MD, MPH      BWH/HMS (Chair)

**Resource Allocation Review Committee**

|                      |                                                |
|----------------------|------------------------------------------------|
| Tom Montine, MD, PhD | University of Washington (Chair)               |
| Cat Conti, BA        | NCIRE / The Veterans Health Research Institute |

**Clinical Core Leaders and Key Personnel**

|                          |                                             |
|--------------------------|---------------------------------------------|
| Ronald Petersen, MD, PhD | Mayo Clinic, Rochester (Core PI)            |
| Paul Aisen, MD           | University of Southern California (Core PI) |
| Michael Rafii, MD, PhD   | University of Southern California           |
| Rema Raman, PhD          | University of Southern California           |
| Gustavo Jimenez, MBS     | University of Southern California           |
| Michael Donohue, PhD     | University of Southern California           |
| Devon Gessert, BS        | University of Southern California           |
| Jennifer Salazar, MBS    | University of Southern California           |
| Caileigh Zimmerman, MS   | University of Southern California           |
| Yuliana Cabrera, BS      | University of Southern California           |
| Sarah Walter, MSc        | University of Southern California           |
| Garrett Miller, MS       | University of Southern California           |
| Godfrey Coker, MBA, MPH  | University of Southern California           |
| Taylor Clanton, MPH      | University of Southern California           |
| Lindsey Hergesheimer, BS | University of Southern California           |
| Stephanie Smith, BS      | University of Southern California           |
| Olusegun Adegoke, MSc    | University of Southern California           |
| Payam Mahboubi, MPH      | University of Southern California           |
| Shelley Moore, BA        | University of Southern California           |
| Jeremy Pizzola, BA       | University of Southern California           |
| Elizabeth Shaffer, BS    | University of Southern California           |

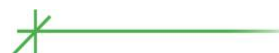

University of Southern California

**Biostatistics Core Leaders and Key Personnel**

|                      |                                           |
|----------------------|-------------------------------------------|
| Laurel Beckett, PhD  | University of California, Davis (Core PI) |
| Danielle Harvey, PhD | University of California, Davis           |
| Michael Donohue, PhD | University of Southern California         |

**MRI Core Leaders and Key Personnel**

|                             |                                                      |
|-----------------------------|------------------------------------------------------|
| Clifford R. Jack, Jr., MD   | Mayo Clinic, Rochester (Core PI)                     |
| Arvin Forghanian-Arani, PhD | Mayo Clinic                                          |
| Bret Borowski, RTR          | Mayo Clinic                                          |
| Chad Ward,                  | Mayo Clinic                                          |
| Christopher Schwarz, PhD    | Mayo Clinic                                          |
| David Jones, MD             | Mayo Clinic                                          |
| Jeff Gunter, PhD            | Mayo Clinic                                          |
| Kejal Kantarci, MD          | Mayo Clinic                                          |
| Matthew Senjem, MS          | Mayo Clinic                                          |
| Prashanthi Vemuri, PhD      | Mayo Clinic                                          |
| Robert Reid, PhD            | Mayo Clinic                                          |
| Nick C. Fox, MD             | University College London                            |
| Ian Malone, PhD             | University College London                            |
| Paul Thompson, PhD          | University of Southern California School of Medicine |
| Sophia I. Thomopoulos, BS   | University of Southern California School of Medicine |
| Talia M. Nir, PhD           | University of Southern California School of Medicine |
| Neda Jahanshad, PhD         | University of Southern California School of Medicine |
| Charles DeCarli, MD         | University of California, Davis                      |
| Alexander Knaack, MS        | University of California, Davis                      |
| Evan Fletcher, PhD          | University of California, Davis                      |
| Danielle Harvey, PhD        | University of California, Davis                      |
| Duygu Tosun-Turgut, PhD     | University of California, San Francisco              |
| Stephanie Rossi Chen, BA.   | NCIRE / The Veterans Health Research Institute       |
| Mark Choe, BS               | NCIRE / The Veterans Health Research Institute       |
| Karen Crawford,             | University of Southern California School of Medicine |
| Paul A. Yushkevich, PhD     | University of Pennsylvania                           |
| Sandhitsu Das, PhD          | University of Pennsylvania                           |

**PET Core Leaders and Key Personnel**

|                       |                                              |
|-----------------------|----------------------------------------------|
| William Jagust, MD    | University of California, Berkeley (Core PI) |
| Robert A. Koeppe, PhD | University of Michigan                       |
| Eric M. Reiman, MD    | Banner Alzheimer's Institute                 |
| Kewei Chen, PhD       | Banner Alzheimer's Institute                 |
| Chet Mathis, MD       | University of Pittsburgh                     |
| Susan Landau, PhD     | University of California, Berkeley           |

**Neuropathology Core Leaders and Key Personnel**

|                               |                                                   |
|-------------------------------|---------------------------------------------------|
| John C. Morris, MD            | Washington University St. Louis                   |
| Richard Perrin MD             | Washington University St. Louis                   |
| Nigel J. Cairns, PhD, FRCPath | Washington University St. Louis—Past Investigator |
| Erin Householder, MS          | Washington University St. Louis                   |

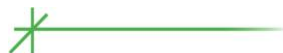

Washington University St. Louis  
Haley Bernhardt, BA, R. EEG T  
Lisa Taylor-Reinwald, BA, HTL  
(ASCP) – Past Investigator

Washington University St. Louis  
Washington University St. Louis

### **Biomarkers Core Leaders and Key Personnel**

|                             |                                                                 |
|-----------------------------|-----------------------------------------------------------------|
| Leslie M. Shaw, PhD         | Perelman School of Medicine, University of Pennsylvania (co-PI) |
| John Q. Trojanowki, MD, PhD | Perelman School of Medicine, University of Pennsylvania (co-PI) |
| Magdalena Korecka, PhD      | Perelman School of Medicine, University of Pennsylvania         |
| Michal Figurski, PhD        | Perelman School of Medicine, University of Pennsylvania         |

### **Informatics Core Leaders and Key Personnel**

|                     |                                             |
|---------------------|---------------------------------------------|
| Arthur W. Toga, PhD | University of Southern California (Core PI) |
| Karen Crawford      | University of Southern California           |
| Scott Neu, PhD      | University of Southern California           |

### **Genetics Core Leaders and Key Personnel**

|                          |                                                 |
|--------------------------|-------------------------------------------------|
| Andrew J. Saykin, PsyD   | Indiana University School of Medicine (Core PI) |
| Kwangsik Nho, PhD        | Indiana University School of Medicine           |
| Shannon L. Risacher, PhD | Indiana University School of Medicine           |
| Liana G. Apostolova, MD  | Indiana University School of Medicine           |
| Li Shen, PhD             | UPenn School of Medicine                        |
| Tatiana M. Foroud, PhD   | NCRAD/Indiana University School of Medicine     |
| Kelly Nudelman, PhD      | NCRAD/Indiana University School of Medicine     |
| Kelley Faber, MS, CCRC   | NCRAD/Indiana University School of Medicine     |
| Kristi Wilmes, MS, CCRP  | NCRAD/Indiana University School of Medicine     |

### **Initial Concept Planning & Development**

|                                   |                                         |
|-----------------------------------|-----------------------------------------|
| Michael W. Weiner, MD             | University of California, San Francisco |
| Leon Thal, MD – Past Investigator | University of California, San Diego     |
| Zaven Khachaturian, PhD           | Prevent Alzheimer's Disease 2020        |

### **NIA**

|                   |                             |
|-------------------|-----------------------------|
| John K. Hsiao, MD | National Institute on Aging |
|-------------------|-----------------------------|

### **Part B: Investigators By Site**

#### **Oregon Health & Science University:**

Lisa C. Silbert, MD  
Betty Lind, BS  
Rachel Crissey  
Jeffrey A. Kaye, MD, A – Past Investigator  
Raina Carter, BA – Past Investigator  
Sara Dolen, BS – Past Investigator  
Joseph Quinn, MD – Past Investigator

Lon S. Schneider, MD  
Sonia Pawluczyk, MD  
Mauricio Becerra, MD  
Liberty Teodoro, RN  
Karen Dagerman, MS  
Bryan M. Spann, DO, PhD – Past Investigator

#### **University of California – San Diego:**

James Brewer, MD, PhD  
Helen Vanderswag, RN

#### **University of Southern California:**

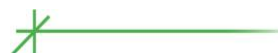

Adam Fleisher, MD – Past Investigator

**University of Michigan:**

Jaimie Ziolkowski, MA, BS, TLLP  
Judith L. Heidebrink, MD, MS  
Lisa Zbizek-Nulph, MS  
Joanne L. Lord, LPN, BA, CCRC – Past Investigator  
Lisa Zbizek-Nulph, MS, CCRP

**Mayo Clinic, Rochester:**

Ronald Petersen, MD, PhD  
Sara S. Mason, RN  
Colleen S. Albers, RN  
David Knopman, MD  
Kris Johnson, RN

**Baylor College of Medicine:**

Javier Villanueva-Meyer, MD  
Valory Pavlik, PhD  
Nathaniel Pacini, MA  
Ashley Lamb, MA  
Joseph S. Kass, MD, LD, FAAN  
Rachelle S. Doody, MD, PhD – Past Investigator  
Victoria Shibley, MS – Past Investigator  
Munir Chowdhury, MBBS, MS – Past Investigator  
Susan Rountree, MD – Past Investigator  
Mimi Dang, MD – Past Investigator

**Columbia University Medical Center:**

Yaakov Stern, PhD  
Lawrence S. Honig, MD, PhD  
Akiva Mintz, MD, PhD

**Washington University, St. Louis:**

Beau Ances, MD, PhD, MSc  
John C. Morris, MD  
David Winkfield, BS  
Maria Carroll, RN, MSN, GCNS-BC  
Georgia Stobbs-Cucchi, RN, CCRP—Past Investigator  
Angela Oliver, RN, BSN, MSG – Past Investigator  
Mary L. Creech, RN, MSW – Past Investigator  
Mark A. Mintun, MD – Past Investigator  
Stacy Schneider, APRN, BC, GNP – Past Investigator

**University of Alabama - Birmingham:**

David Geldmacher, MD  
Marissa Natelson Love, MD

Randall Griffith, PhD, ABPP – Past Investigator  
David Clark, MD – Past Investigator  
John Brockington, MD – Past Investigator  
Daniel Marson, JD, PhD – Past Investigator

**Mount Sinai School of Medicine:**

Hillel Grossman, MD  
Martin A. Goldstein, MD  
Jonathan Greenberg, BA  
Effie Mitsis, PhD – Past Investigator

**Rush University Medical Center:**

Raj C. Shah, MD  
Melissa Lamar, PhD  
Patricia Samuels

**Wien Center:**

Ranjan Duara, MD  
Maria T. Greig-Custo, MD  
Rosemarie Rodriguez, PhD

**Johns Hopkins University:**

Marilyn Albert, PhD  
Chiadi Onyike, MD  
Leonie Farrington, RN  
Scott Rudow, BS  
Rottislav Brichko, BS  
Stephanie Kielb, BS – Past Investigator

**University of South Florida: USF Health Byrd Alzheimer's Institute:**

Amanda Smith, MD  
Balebail Ashok Raj, MD – Past Investigator  
Kristin Fargher, MD – Past Investigator

**New York University:**

Martin Sadowski, MD, PhD  
Thomas Wisniewski, MD  
Melanie Shulman, MD  
Arline Faustin, MD  
Julia Rao, PhD  
Karen M. Castro, BA  
Anasztasia Ulysse, BA  
Shannon Chen, BA  
Mohammed O. Sheikh, MD – Past Investigator  
Jamika Singleton-Garvin, CCRP – Past Investigator

**Duke University Medical Center:**

P. Murali Doraiswamy, MBBS, FRCP  
Jeffrey R. Petrella, MD  
Olga James, MD



Terence Z. Wong, MD  
Salvador Borges-Neto, MD – Past Investigator

**University of Pennsylvania:**

Jason H. Karlawish, MD  
David A. Wolk, MD  
Sanjeev Vaishnavi, MD  
Christopher M. Clark, MD – Past Investigator  
Steven E. Arnold, MD – Past Investigator

**University of Kentucky:**

Charles D. Smith, MD

Gregory A. Jicha, MD, PhD  
Riham El Khouli, MD  
Flavius D. Raslau, MD

**University of Pittsburgh:**

Oscar L. Lopez, MD  
MaryAnn Oakley, MA  
Donna M. Simpson, CRNP, MPH

**University of Rochester Medical Center:**

Anton P. Porsteinsson, MD  
Kim Martin, RN  
Nancy Kowalski, MS, RNC  
Melanie Keltz, RN  
Bonnie S. Goldstein, MS, NP – Past Investigator  
Kelly M. Makino, BS – Past Investigator  
M. Saleem Ismail, MD – Past Investigator  
Connie Brand, RN – Past Investigator

**University of California Irvine IMIND:**

Gaby Thai, MD  
Aimee Pierce, MD  
Beatriz Yanez, RN  
Elizabeth Sosa, PhD  
Megan Witbracht, PhD

**University of Texas Southwestern Medical School:**

Brendan Kelley, MD  
Trung Nguyen, MD  
Kyle Womack, MD  
Dana Mathews, MD, PhD – Past Investigator  
Mary Quiceno, MD – Past Investigator

**Emory University:**

Allan I. Levey, MD, PhD  
James J. Lah, MD, PhD

Ihab Hajjar, MD  
Janet S. Cellar, DNP, PMHCNS-BC – Past Investigator

**University of Kansas, Medical Center:**

Jeffrey M. Burns, MD  
Russell H. Swerdlow, MD  
William M. Brooks, PhD

**University of California, Los Angeles:**

Daniel H.S. Silverman, MD, PhD  
Sarah Kremen, MD  
Liana Apostolova, MD – Past Investigator  
Kathleen Tingus, PhD – Past Investigator  
Po H. Lu, PsyD – Past Investigator  
George Bartzokis, MD – Past Investigator  
Ellen Woo, PhD – Past Investigator  
Edmond Teng, MD, PhD – Past Investigator

**Mayo Clinic, Jacksonville:**

Neill R Graff-Radford, MBBCH, FRCP (London)  
Francine Parfitt, MSH, CCRC  
Kim Poki-Walker, BA

**Indiana University:**

Martin R. Farlow, MD  
Ann Marie Hake, MD – Past Investigator  
Brandy R. Matthews, MD – Past Investigator  
Jared R. Brosch, MD  
Scott Herring, RN, CCRC

**Yale University School of Medicine:**

Christopher H. van Dyck, MD  
Adam P. Mecca, MD, PhD  
Adam P. Mecca, MD, PhD  
Susan P. Good, APRN  
Martha G. MacAvoy, PhD  
Richard E. Carson, PhD  
Pradeep Varma, MD

**McGill Univ., Montreal-Jewish General Hospital:**

Howard Chertkow, MD  
Susan Vaitekunis, MD  
Chris Hosein, MEd

**Sunnybrook Health Sciences, Ontario:**

Sandra Black, MD, FRCPC  
Bojana Stefanovic, PhD  
Chris (Chinthaka) Heyn, BSc, PhD, MD, FRCPC

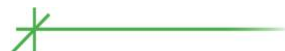

**U.B.C. Clinic for AD & Related Disorders:**

Ging-Yuek Robin Hsiung, MD, MHSc, FRCPC  
Ellen Kim, BA  
Benita Mudge, BS  
Vesna Sossi, PhD  
Howard Feldman, MD, FRCPC – Past Investigator  
Michele Assaly, MA – Past Investigator

**St. Joseph's Health Care:**

Elizabeth Finger, MD  
Stephen Pasternak, MD  
Irina Rachinsky, MD  
Andrew Kertesz, MD – Past Investigator  
Dick Drost, MD – Past Investigator  
John Rogers, MD – Past Investigator

**Northwestern University:**

Ian Grant, MD  
Brittanie Muse, MSPH  
Emily Rogalski, PhD  
Jordan Robson  
M.-Marsel Mesulam, MD – Past Investigator  
Diana Kerwin, MD – Past Investigator  
Chuang-Kuo Wu, MD, PhD – Past Investigator  
Nancy Johnson, PhD – Past Investigator  
Kristine Lipowski, MA – Past Investigator  
Sandra Weintraub, PhD – Past Investigator  
Borna Bonakdarpour, MD – Past Investigator

**Nathan Kline Institute:**

Nunzio Pomara, MD  
Raymundo Hernando, MD  
Antero Sarrael, MD

**University of California, San Francisco:**

Howard J. Rosen, MD  
Bruce L. Miller, MD  
David Perry, MD

**Georgetown University Medical Center:**

Raymond Scott Turner, MD, PhD  
Kathleen Johnson, NP  
Brigid Reynolds, NP  
Kelly McCann, BA  
Jessica Poe, BS

**Brigham and Women's Hospital:**

Reisa A. Sperling, MD  
Keith A. Johnson, MD

Gad A. Marshall, MD

**Stanford University:**

Jerome Yesavage, MD  
Joy L. Taylor, PhD  
Steven Chao, MD, PhD  
Jaila Coleman, BA  
Jessica D. White, BA – Past Investigator  
Barton Lane, MD – Past Investigator  
Allyson Rosen, PhD – Past Investigator  
Jared Tinklenberg, MD – Past Investigator

**Banner Sun Health Research Institute:**

Christine M. Belden, PsyD  
Alireza Atri, MD, PhD  
Bryan M. Spann, DO, PhD  
Kelly A. Clark  
Edward Zamrini, MD – Past Investigator  
Marwan Sabbagh, MD – Past Investigator

**Boston University:**

Ronald Killiany, PhD  
Robert Stern, PhD  
Jesse Mez, MD, MS  
Neil Kowall, MD – Past Investigator  
Andrew E. Budson, MD – Past Investigator

**Howard University:**

Thomas O. Obisesan, MD, MPH  
Oyonomo E. Ntekim, MD, PhD  
Saba Wolday, MSc  
Javed I. Khan, MD  
Evaristus Nwulia, MD  
Sheeba Nadarajah, PhD

**Case Western Reserve University:**

Alan Lerner, MD  
Paula Ogrocki, PhD  
Curtis Tatsuoka, PhD  
Parianne Fatica, BA, CCRC

**University of California, Davis – Sacramento:**

Evan Fletcher, PhD  
Pauline Maillard, PhD  
John Olichney, MD  
Charles DeCarli, MD  
Owen Carmichael, PhD – Past Investigator

**Dent Neurologic Institute:**

Vernice Bates, MD

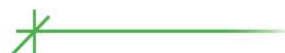



Horacio Capote, MD  
Michelle Rainka, PharmD, CCRP

**Parkwood Institute:**

Michael Borrie, MB ChB  
T-Y Lee, PhD  
Dr Rob Bartha, PhD

**University of Wisconsin:**

Sterling Johnson, PhD  
Sanjay Asthana, MD  
Cynthia M. Carlsson, MD, MS

**Banner Alzheimer's Institute:**

Allison Perrin, PhD  
Anna Burke, PhD – Past Investigator

**Ohio State University:**

Douglas W. Scharre, MD  
Maria Kataki, MD, PhD  
Rawan Tarawneh, MD  
Brendan Kelley, MD – Past Investigator

**Albany Medical College:**

David Hart, MD  
Earl A. Zimmerman, MD  
Dzintra Celmins, MD

**University of Iowa College of Medicine**

Delwyn D. Miller, PharmD, MD  
Laura L. Boles Ponto, PhD  
Karen Ekstam Smith, RN  
Hristina Koleva, MD  
Hyungsub Shim, MD  
Ki Won Nam, MD – Past Investigator  
Susan K. Schultz, MD – Past Investigator

**Wake Forest University Health Sciences:**

Jeff D. Williamson, MD, MHS  
Suzanne Craft, PhD  
Jo Cleveland, MD  
Mia Yang, MD – Past Investigator  
Kaycee M. Sink, MD, MAS – Past Investigator

**Rhode Island Hospital:**

Brian R. Ott, MD  
Jonathan Drake, MD  
Geoffrey Tremont, PhD

Lori A. Daiello, Pharm.D, ScM  
Jonathan D. Drake, MD

**Cleveland Clinic Lou Ruvo Center for Brain Health:**

Marwan Sabbagh, MD  
Aaron Ritter, MD  
Charles Bernick, MD, MPH – Past Investigator  
Donna Munic, PhD – Past Investigator  
Akiva Mintz, MD, PhD – Past Investigator

**Roper St. Francis Healthcare:**

Abigail O'Connell, MS, APRN, FNP-C  
Jacobo Mintzer, MD, MBA  
Arthur Williams, BS

**Houston Methodist Neurological Institute:**

Joseph Masdeu, PhD

**Barrow Neurological Institute:**

Jiong Shi, MD, PhD  
Angelica Garcia, BS  
Marwan Sabbagh – Past Investigator

**Vanderbilt University Medical Center:**

Paul Newhouse, PhD

**Long Beach VA Neuropsychiatric Research Program:**

Steven Potkin, PhD

**Butler Hospital Memory and Aging Program:**

Stephen Salloway, MD, MS  
Paul Malloy, PhD  
Stephen Correia, PhD

**Neurological Care of CNY:**

Smita Kittur, MD – Past Investigator

**Hartford Hospital, Olin Neuropsychiatry Research Center:**

Godfrey D. Pearlson, MD – Past Investigator  
Karen Blank, MD – Past Investigator  
Karen Anderson, RN – Past Investigator

**Dartmouth-Hitchcock Medical Center:**

Laura A. Flashman, PhD – Past Investigator  
Marc Seltzer, MD – Past Investigator  
Mary L. Hynes, RN, MPH – Past Investigator  
Robert B. Santulli, MD – Past Investigator



Michael Lin, MD – Past Investigator  
Lisa Ravdin, PhD – Past Investigator

**Cornell University**

Norman Relkin, MD, PhD – Past Investigator

Gloria Chiang, MD – Past Investigator

Athena Lee, PhD

## II. DOD ADNI

### Part A: Leadership and Infrastructure

#### **Principal Investigator**

Michael W. Weiner, MD                                      University of California, San Francisco

#### **ATRI PI and Director of Coordinating Center Clinical Core**

Paul Aisen, MD                                      University of Southern California  
Co Director Clinical Core Ron Petersen                      Mayo Clinic

#### **Executive Committee**

|                             |                                                         |
|-----------------------------|---------------------------------------------------------|
| Michael W. Weiner, MD       | University of California, San Francisco                 |
| Paul Aisen, MD              | University of Southern California                       |
| Ronald Petersen, MD, PhD    | Mayo Clinic, Rochester                                  |
| Robert C. Green, MD, MPH    | Brigham and Women's Hospital/<br>Harvard Medical School |
| Danielle Harvey, PhD        | University of California, Davis                         |
| Clifford R. Jack, Jr., MD   | Mayo Clinic, Rochester                                  |
| William Jagust, MD          | University of California, Berkeley                      |
| John C. Morris, MD          | Washington University St. Louis                         |
| Andrew J. Saykin, PsyD      | Indiana University                                      |
| Leslie M. Shaw, PhD         | Perelman School of Medicine, University of Pennsylvania |
| Arthur W. Toga, PhD         | University of Southern California                       |
| John Q. Trojanowki, MD, PhD | Perelman School of Medicine, University of Pennsylvania |

#### **Psychological Evaluation/PTSD Core**

Thomas Neylan, MD                                      University of California, San Francisco

#### **Traumatic Brain Injury/TBI Core**

Jordan Grafman, PhD                                      Rehabilitation Institute of Chicago, Feinberg School of Medicine,  
Northwestern University

#### **Data and Publication Committee (DPC)**

Robert C. Green, MD, MPH                              BWH/HMS (Chair)

#### **Resource Allocation Review Committee**

Tom Montine, MD, PhD                                      University of Washington (Chair)

#### **Clinical Core Leaders and Key Personnel**

|                          |                                             |
|--------------------------|---------------------------------------------|
| Michael W. Weiner MD     | Core PI                                     |
| Ronald Petersen, MD, PhD | Mayo Clinic, Rochester (Core PI)            |
| Paul Aisen, MD           | University of Southern California (Core PI) |
| Gustavo Jimenez, MBS     | University of Southern California           |
| Michael Donohue, PhD     | University of Southern California           |
| Devon Gessert, BS        | University of Southern California           |
| Jennifer Salazar, MBS    | University of Southern California           |
| Caileigh Zimmerman, MS   | University of Southern California           |
| Sarah Walter, MSc        | University of Southern California           |
| Olusegun Adegokpe, MSc   | University of Southern California           |
| Payam Mahboubi, MPH      | University of Southern California           |

University of Southern California

|                              |                                   |
|------------------------------|-----------------------------------|
| Sarah Danowski, MA           | University of Southern California |
| Godfrey Coker, MBA, MPH      | University of Southern California |
| Taylor Clanton, MPH          | University of Southern California |
| Jeremy Pizzola, BA           | University of Southern California |
| Elizabeth Shaffer, BS        | University of Southern California |
| Catherine Nguyen-Barrera, MS | University of Southern California |

**San Francisco Veterans Affairs Medical Center**

|                   |                                         |
|-------------------|-----------------------------------------|
| Thomas Neylan, MD | University of California, San Francisco |
| Jacqueline Hayes  | University of California, San Francisco |
| Shannon Finley    | University of California, San Francisco |

**Biostatistics Core Leaders and Key Personnel**

|                      |                                           |
|----------------------|-------------------------------------------|
| Danielle Harvey, PhD | University of California, Davis (Core PI) |
| Michael Donohue, PhD | University of California, San Diego       |

**MRI Core Leaders and Key Personnel**

|                           |                                                |
|---------------------------|------------------------------------------------|
| Clifford R. Jack, Jr., MD | Mayo Clinic, Rochester (Core PI)               |
| Matthew Bernstein, PhD    | Mayo Clinic, Rochester                         |
| Bret Borowski, RT         | Mayo Clinic                                    |
| Jeff Gunter, PhD          | Mayo Clinic                                    |
| Matt Senjem, MS           | Mayo Clinic                                    |
| Kejal Kantarci            | Mayo Clinic                                    |
| Chad Ward                 | Mayo Clinic                                    |
| Duygu Tosun-Turgut, PhD   | University of California, San Francisco        |
| Stephanie Rossi Chen, BA  | NCIRE / The Veterans Health Research Institute |

**PET Core Leaders and Key Personnel**

|                       |                                            |
|-----------------------|--------------------------------------------|
| Susan Landau, PhD     | University of California, Berkeley Core PI |
| Robert A. Koeppe, PhD | University of Michigan                     |
| Norm Foster, MD       | University of Utah                         |
| Eric M. Reiman, MD    | Banner Alzheimer's Institute               |
| Kewei Chen, PhD       | Banner Alzheimer's Institute               |

**Neuropathology Core Leaders**

|                            |                                 |
|----------------------------|---------------------------------|
| John C. Morris, MD         | Washington University St. Louis |
| Richard J. Perrin, MD, PhD | Washington University St. Louis |
| Erin Franklin, MS          | Washington University St. Louis |

**Biomarkers Core Leaders and Key Personnel**

|                             |                                                         |
|-----------------------------|---------------------------------------------------------|
| Leslie M. Shaw, PhD         | Perelman School of Medicine, University of Pennsylvania |
| John Q. Trojanowki, MD, PhD | Perelman School of Medicine, University of Pennsylvania |
| Magdalena Korecka, PhD      | Perelman School of Medicine, University of Pennsylvania |
| Michal Figurski, PhD        | Perelman School of Medicine, University of Pennsylvania |

**Informatics Core Leaders and Key Personnel**

|                     |                                             |
|---------------------|---------------------------------------------|
| Arthur W. Toga, PhD | University of Southern California (Core PI) |
| Karen Crawford      | University of Southern California           |

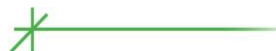

**Genetics Core Leaders and Key Personnel**

Andrew J. Saykin, PsyD University

Tatiana M. Foroud, PhD

Steven Potkin, MD UC

Li Shen, PhD

Indiana University

UC Irvine

Indiana University

Kelley Faber, MS, CCRC

Sungeun Kim, PhD

Kwangsik Nho, PhD

Kristi Wilmes, MS, CCRP

Indiana University

Indiana University

Indiana University

NCRAD

**Part B: Investigators By Site****University of Southern California:**

Lon S. Schneider, MD

Sonia Pawluczyk, MD

Mauricio Becerra, MD

Liberty Teodoro, RN

Karen Dagerman, MS

Bryan M. Spann, DO, PhD – Past Investigator

Terence Z. Wong, MD

**University of Rochester Medical Center:**

Anton P. Porsteinsson, MD

Bonnie Goldstein, MS, NP

Kimberly S. Martin, RN

**University of California, Irvine:**

Gaby Thai, MD

Aimee Pierce, MD

Christopher Reist, MD

Beatriz Yanez, RN

Elizabeth Sosa, PhD

Megan Witbracht, PhD

**University of California, San Diego:**

James Brewer, MD, PhD

Helen Vanderswag, RN

Adam Fleisher, MD – Past Investigator

**Premiere Research Inst (Palm Beach Neurology):**

Carl Sadowsky, MD

Walter Martinez, MD

Teresa Villena, MD

**Columbia University Medical Center:**

Yaakov Stern, PhD

Lawrence S. Honig, MD, PhD

Akiva Mintz, MD, PhD

**Rush University Medical Center:**

Raj C. Shah, MD

Ajay Sood, MD, PhD

Kimberly S. Blanchard, DNP, APRN, NP-C

Debra Fleischman, PhD – Past Investigator

Konstantinos Arfanakis, PhD – Past Investigator

**University of California, San Francisco:**

Howard Rosen, MD

David Perry

**Wien Center:**

Dr. Ranjan Duara MD PI

Dr. Daniel Varon MD Co-PI

Maria T Greig HP Coordinator

**Georgetown University Medical Center:**

Raymond Scott Turner, MD, PhD

Kathleen Johnson, NP

Brigid Reynolds, NP

Kelly MCCann, BA

Jessica Poe, BS

**Duke University Medical Center:**

P. Murali Doraiswamy, MBBS, FRCP

Jeffrey R. Petrella, MD

Olga James, MD – Past Investigator

Salvador Borges-Neto, MD

**Brigham and Women's Hospital:**

Reisa A. Sperling, MD

Keith A. Johnson, MD



Gad Marshall, MD

**Banner Sun Health Research Institute:**

Christine M. Belden, PsyD

Alireza Atri, MD, PhD

Bryan M. Spann, DO, PhD

Kelly A. Clark

Edward Zamrini, MD – Past Investigator

Marwan Sabbagh, MD – Past Investigator

**Howard University:**

Thomas O. Obisesan, MD, MPH

Oyonumo E. Ntekim, MD, PhD

Saba Wolday, MSc

Evaristus Nwulia, MD

Sheeba Nadarajah, PhD, RN

**University of Wisconsin:**

Sterling Johnson, PhD

Sanjay Asthana, MD

Cynthia M. Carlsson, MD, MS

**University of Washington:**

Elaine R. Peskind, MD

Eric C. Petrie, MD, MS

Gail Li, MD, PhD

**Stanford University:**

Jerome Yesavage, MD

Joy L. Taylor, PhD

Steven Chao, MD, PhD

Jaila Coleman, BA

Jessica D. White, BA – Past Investigator

Barton Lane, MD – Past Investigator

Allyson Rosen, PhD – Past Investigator

Jared Tinklenberg, MD – Past Investigator

**Cornell University:**

Michael Lin, PhD

Gloria Chiang, MD

Lisa Ravdin, PhD

Norman Relkin, MD, PhD – Past Investigator

**Roper St. Francis Healthcare:**

Abigail O'Connell, MS, APRN, FNP-C

Jacobo Mintzer, MD, MBA

Arthur Williams, BS



### III. ADNI Depression

#### Part A: Leadership and Infrastructure

##### **Principal Investigator**

Scott Mackin, PhD University of California, San Francisco

##### **ATRI Coordinating Center Clinical Core**

|                               |                                   |
|-------------------------------|-----------------------------------|
| Paul Aisen, MD                | University of Southern California |
| Rema Raman, PhD               | University of Southern California |
| Gustavo Jimenez-Maggiore, MBS | University of Southern California |
| Michael Donohue, PhD          | University of Southern California |
| Devon Gessert, BS             | University of Southern California |
| Jennifer Salazar, MBS         | University of Southern California |
| Caileigh Zimmerman, MS        | University of Southern California |
| Sarah Walter, MSc             | University of Southern California |
| Olusegun Adegoke, MSc         | University of Southern California |
| Payam Mahboubi, MPH           | University of Southern California |

##### **Executive Committee**

|                           |                                         |
|---------------------------|-----------------------------------------|
| Scott Mackin, PhD         | University of California, San Francisco |
| Michael W. Weiner, MD     | University of California, San Francisco |
| Paul Aisen, MD            | University of Southern California       |
| Rema Raman, PhD           | University of Southern California       |
| Clifford R. Jack, Jr., MD | Mayo Clinic, Rochester                  |
| Susan Landau, PhD         | University of California, Berkeley      |
| Andrew J. Saykin, PsyD    | Indiana University                      |
| Arthur W. Toga, PhD       | University of Southern California       |
| Charles DeCarli, MD       | University of California, Davis         |
| Robert A. Koeppe, PhD     | University of Michigan                  |

##### **Data and Publication Committee (DPC)**

|                          |                    |
|--------------------------|--------------------|
| Robert C. Green, MD, MPH | BWH/HMS (Chair)    |
| Erin Drake, MA           | BWM/HMS (Director) |

##### **Clinical Core Leaders**

|                      |                                   |
|----------------------|-----------------------------------|
| Michael W. Weiner MD | Core PI                           |
| Paul Aisen, MD       | University of Southern California |
| Rema Raman, PhD      | University of Southern California |
| Mike Donohue, PhD    | University of Southern California |

##### **Psychiatry Site Leaders and Key Personnel**

|                    |                                         |
|--------------------|-----------------------------------------|
| Scott Mackin, PhD  | University of California, San Francisco |
| Craig Nelson, MD   | University of California, San Francisco |
| David Bickford, BA | University of California, San Francisco |
| Meryl Butters, PhD | University of Pittsburgh                |
| Michelle Zmuda, MA | University of Pittsburgh                |

##### **MRI Core Leaders and Key Personnel**



Clinic, Rochester (Core PI)

Matthew Bernstein, PhD

Bret Borowski, RT

Jeff Gunter, PhD

Matt Senjem, MS

Kejal Kantarci, MD

Chad Ward, BA

Denise Reyes, BS

Mayo Clinic, Rochester

### **PET Core Leaders and Key Personnel**

Robert A. Koeppe, PhD

Susan Landau, PhD

University of Michigan

University of California, Berkeley

### **Informatics Core Leaders and Key Personnel**

Arthur W. Toga, PhD

Karen Crawford

Scott Neu, PhD

University of Southern California (Core PI)

University of Southern California

University of Southern California

### **Genetics Core Leaders and Key Personnel**

Andrew J. Saykin, PsyD

Tatiana M. Foroud, PhD

Kelley M. Faber, MS, CCRC

Kwangsik Nho, PhD

Kelly N. Nudelman

Indiana University

Indiana University

Indiana University

Indiana University

Indiana University

### **Part B: Investigators By Site**

#### **University of California, San Francisco:**

Scott Mackin, PhD

Howard Rosen, MD

Craig Nelson, MD

David Bickford, BA

Yiu Ho Au, BA

Kelly Scherer, BS

Daniel Catalinotto, BA

Samuel Stark, BA

Elise Ong, BA

Dariella Fernandez, BA

#### **University of Pittsburgh:**

Meryl Butters, PhD

Michelle Zmuda, BS

Oscar L. Lopez, MD

MaryAnn Oakley, MA

Donna M. Simpson, CRNP, MPH



Supplement: sd1 [file 1]
